# Supplementary material
Source: publisher site journal article supplement (https://www.dovepress.com/article/472481)
Supplement: Supplementary file 1 [file get_supplementary_file.php]

**Supplementary Information**

Table S1: Statistical significance between Baseline and CMM treatment

|  | **Baseline** | | | **CMM treatment** | | | **Change is Significant?** | **P value** |
| --- | --- | --- | --- | --- | --- | --- | --- | --- |
| **Mean** | **Std** | **N** | **Mean** | **Std** | **N** |
| NRS | 7.9 | 0.9 | 55 | 7.6 | 1.6 | 55 | No | 0.2282 |
| ODI | 54.5 | 13.7 | 55 | 54 | 15.5 | 55 | No | 0.8581 |
| PCS | 26.3 | 11.8 | 55 | 24.9 | 13.2 | 55 | No | 0.5588 |
| PROMIS 29 Physical Function | 34 | 4.5 | 55 | 34.3 | 4.6 | 55 | No | 0.7302 |
| PROMIS 29 Anxiety | 53.5 | 10.9 | 55 | 54.9 | 9.8 | 55 | No | 0.4803 |
| PROMIS 29 Depression | 50.6 | 9.5 | 55 | 51.8 | 9.1 | 55 | No | 0.5002 |
| PROMIS 29 Fatigue | 57.7 | 8.5 | 55 | 59 | 9.3 | 55 | No | 0.4458 |
| PROMIS 29 Sleep Disturbance | 58 | 7.9 | 55 | 60.3 | 6.7 | 55 | No | 0.1025 |
| PROMIS 29 Social Function | 39.5 | 6.2 | 55 | 38.5 | 6.6 | 55 | No | 0.4146 |
| PROMIS 29 Pain Interference | 67.7 | 5.7 | 55 | 67.5 | 5.3 | 55 | No | 0.8492 |
| PROMIS 29 Pain Intensity | 7.3 | 1.5 | 55 | 7.5 | 1.4 | 55 | No | 0.4713 |
| Opioid MME | 26.4 | 16.8 | 19 | 26.7 | 18.4 | 19 | No | 0.9584 |

Change is considered significant is P≤0.05

Table S2: Statistical significance between CMM and SCS treatment

|  | **CMM treatment** | | | **Post SCS** | | | **Change is Significant?** | **P value** |
| --- | --- | --- | --- | --- | --- | --- | --- | --- |
| **Mean** | **Std** | **N** | **Mean** | **Std** | **N** |
| NRS | 7.6 | 1.6 | 55 | 3.1 | 2.2 | 49 | Yes | <0.000001 |
| ODI | 54 | 15.5 | 55 | 29.5 | 18.2 | 47 | Yes | <0.000001 |
| PCS | 24.9 | 13.2 | 55 | 12 | 11 | 49 | Yes | <0.000001 |
| PROMIS 29 Physical Function | 34.3 | 4.6 | 55 | 40.9 | 6.2 | 49 | Yes | <0.000001 |
| PROMIS 29 Anxiety | 54.9 | 9.8 | 55 | 50.3 | 9.2 | 49 | Yes | 0.015612 |
| PROMIS 29 Depression | 51.8 | 9.1 | 55 | 48.3 | 8.2 | 49 | No | 0.042858 |
| PROMIS 29 Fatigue | 59 | 9.3 | 55 | 51.6 | 10 | 49 | Yes | 0.000167 |
| PROMIS 29 Sleep Disturbance | 60.3 | 6.7 | 55 | 50.9 | 8.7 | 49 | Yes | <0.000001 |
| PROMIS 29 Social Function | 38.5 | 6.6 | 55 | 47.6 | 8.8 | 49 | Yes | <0.000001 |
| PROMIS 29 Pain Interference | 67.5 | 5.3 | 55 | 57.1 | 9.7 | 49 | Yes | <0.000001 |
| PROMIS 29 Pain Intensity | 7.5 | 1.4 | 55 | 3.7 | 2.4 | 49 | Yes | <0.000001 |
| Opioid MME | 26.7 | 18.4 | 19 | 18.2 | 19.4 | 17 | No | 0.186333 |

Change is considered significant is P≤0.05
